# Supplementary material for: The fluorination-assisted dealloying synthesis of porous reduced graphene oxide-FeF2@carbon for high-performance lithium-ion battery and the exploration of its electrochemical mechanism
Source: Royal Society of Chemistry journal article supplement (doi:10.1039/d1qi00273b), 2021-01-01
Supplement: d1qi00273b1.pdf [file d1qi00273b1.pdf]

**Supplementary Information for:**  
**Fluorination-assisted dealloying synthesis of porous rGO-  
FeF<sub>2</sub>@C for high-performance lithium-ion battery and the  
exploration of its electrochemical mechanism**

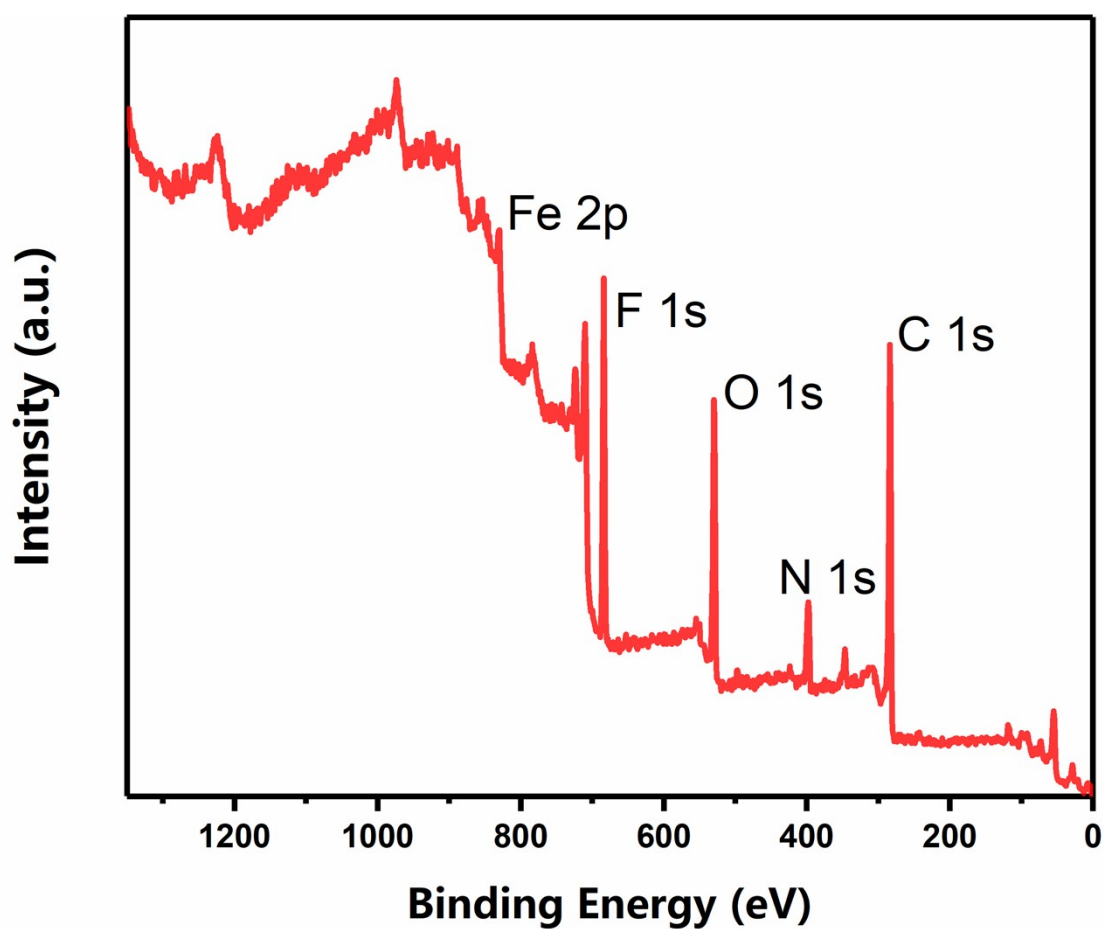

Fig. S1 The XPS survey spectrum of rGO-FeF<sub>2</sub>@C

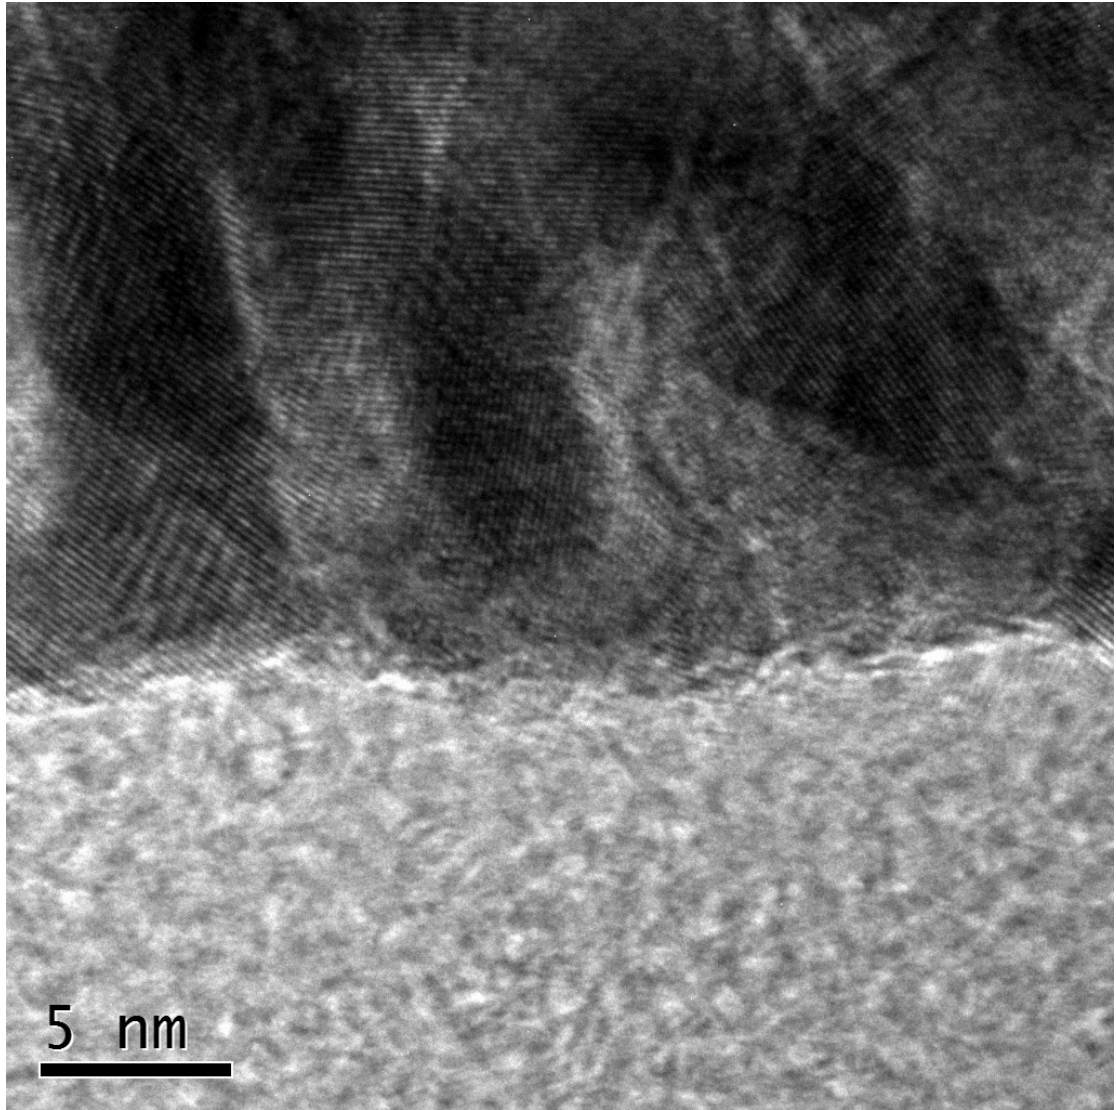

Fig. S2 The HRTEM image of P-FeF<sub>2</sub>.

### The confirmation experiment of the surface potential of FeF<sub>2</sub>

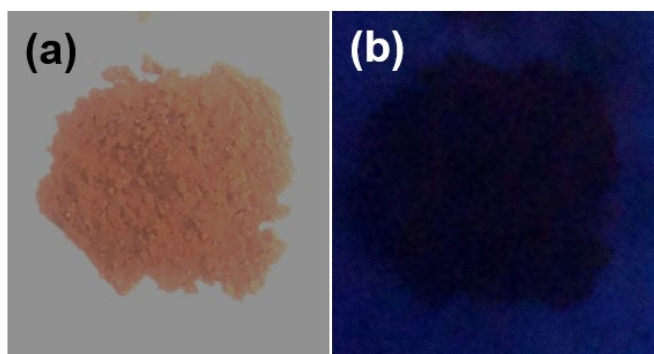

Fig. S3 The photograph of the fluorescein sodium powders under (a) visible light and (b) UV.

The experiments were conducted using a fluorescent-labeling method to explore the surface charge of the FeF<sub>2</sub>. Fluorescein sodium was chosen as a fluorescent label. As an anionic fluorescent molecule, the fluorescein sodium prefers to close to the positively charged substances. As be shown in Fig. 3(d), the fluorescein sodium/ethanol solution showed a yellow color in visible light and yellow-green fluorescence under UV-light. However, the dried fluorescein sodium powders didn't fluoresce under UV (Fig. S2). suggests that the fluorescein sodium shows fluorescence property in only the solvation environment. When FeF<sub>2</sub> was added to the fluorescein sodium /ethanol solution, the original yellow solution turns to colorless and transparent in visible and the fluorescence dims under UV-light. According to previously observed phenomena, we speculate that the fluorescein sodium molecules were adsorbed on the surface FeF<sub>2</sub> particles. Thus, the fluorescein sodium molecules lost their fluorescence property due to diverging from the solvation environment. This indicates that the FeF<sub>2</sub> surface is positively charged.

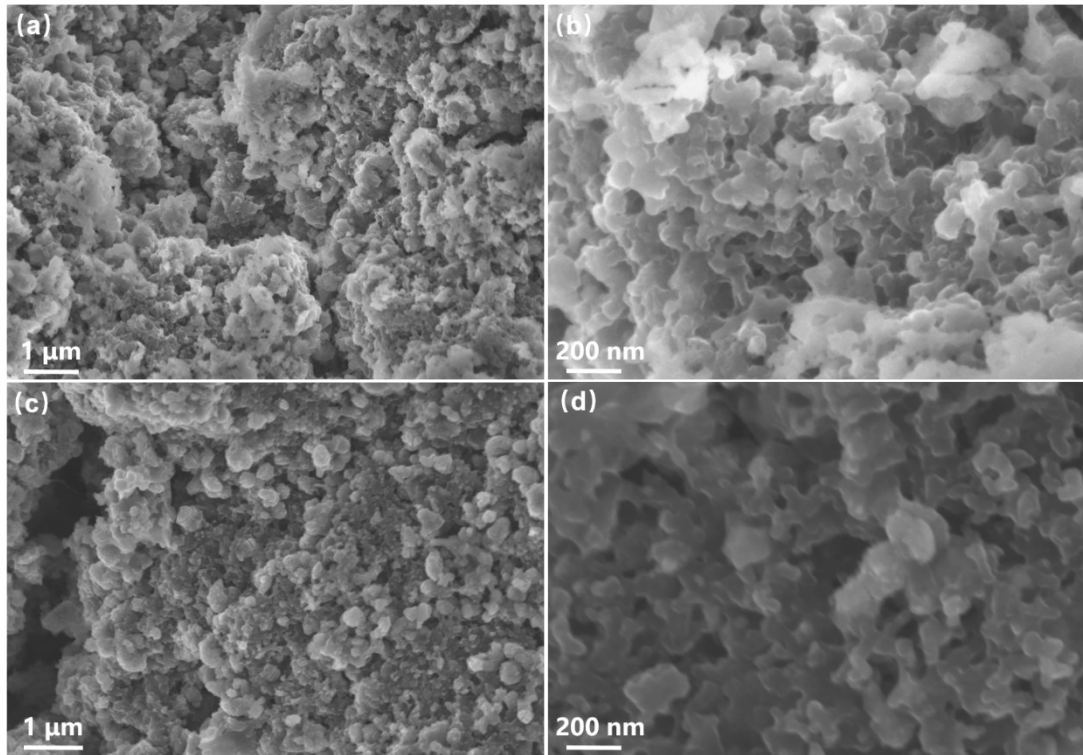

Fig. S4 SEM image of rGO-FeF<sub>2</sub>@C after (a,b) 20 cycles and (c,d) 50 cycles.

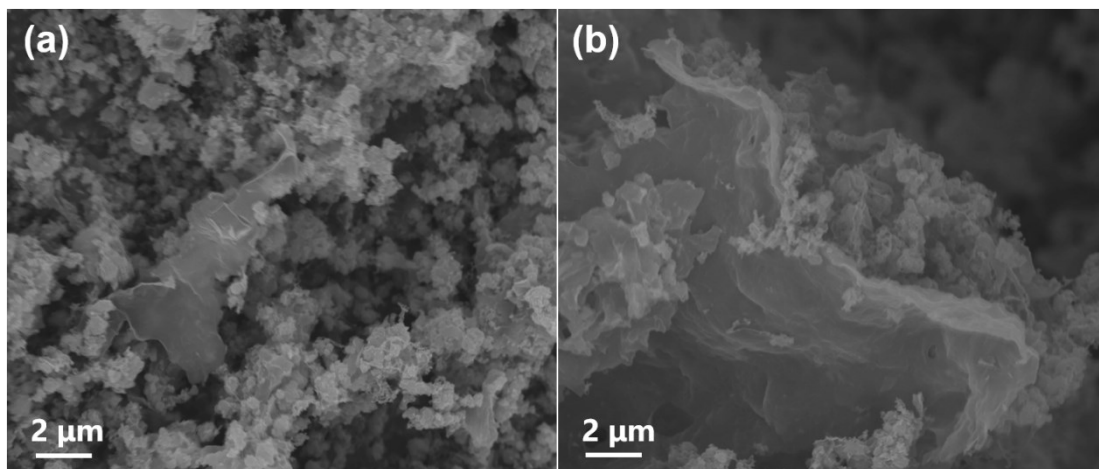

Fig. S5 (a) & (b) SEM image of rGO-FeF<sub>2</sub>@gluC.

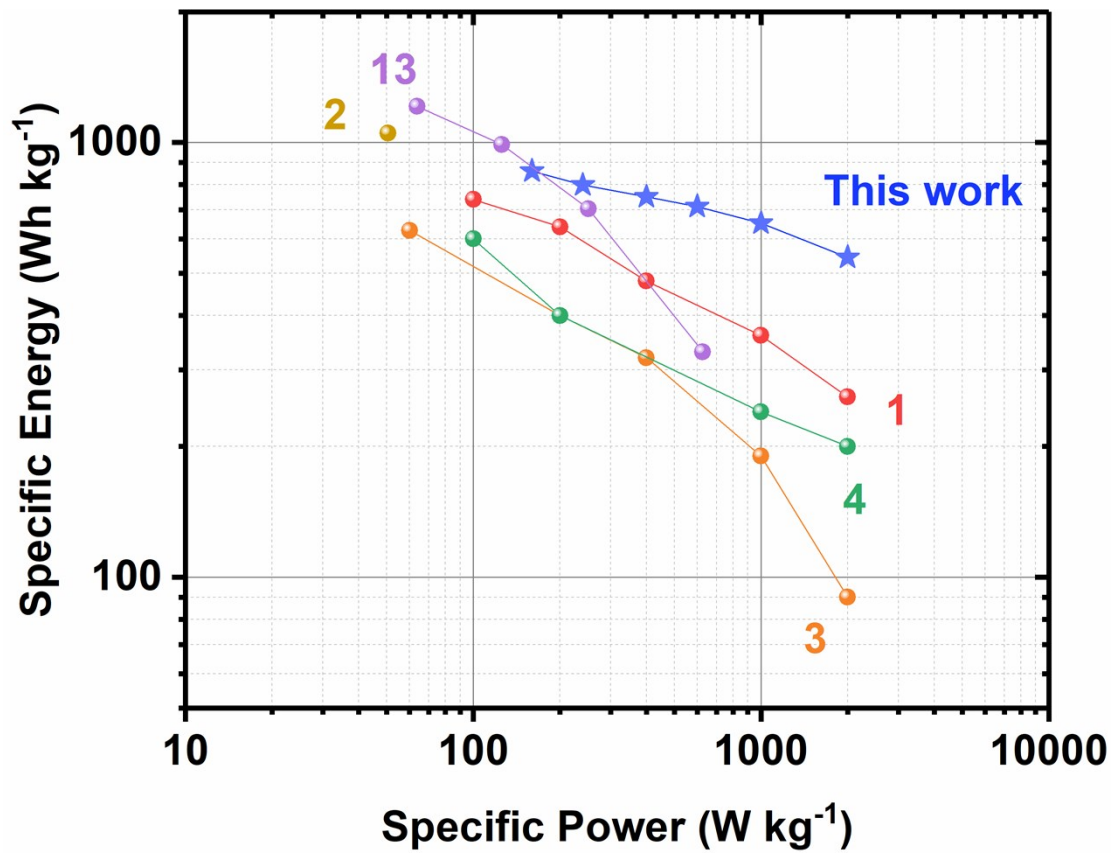

Fig. S6 Ragone plots of comparing with different literature in power density and energy density.

**Tab. S1** Comparison of the electrochemical performance of the conversion type FeF<sub>2</sub> cathode materials.

| materials                                           | Current density         | Voltage range | 1 <sup>st</sup> discharge capacity | Reversible capacity      | Cycle number | Remaining capacity       | Ref       |
|-----------------------------------------------------|-------------------------|---------------|------------------------------------|--------------------------|--------------|--------------------------|-----------|
| Ni@FeF <sub>2</sub> @Al <sub>2</sub> O <sub>3</sub> | 200 mA g <sup>-1</sup>  | 4.2-1.2 V     | 557 mAh g <sup>-1</sup>            | ~400 mAh g <sup>-1</sup> | 50           | 250 mAh g <sup>-1</sup>  | 1         |
| BM-C(FeF <sub>2</sub> ) <sub>0.55</sub>             | 22.7 mA g <sup>-1</sup> | 4.3-1.3 V     | 538 mAh g <sup>-1</sup>            | 456 mAh g <sup>-1</sup>  | 25           | 320 mAh g <sup>-1</sup>  | 2         |
| FeF <sub>2</sub> -carbon core-shell                 | 30 mA g <sup>-1</sup>   | 4.3-1.3 V     | 345 mAh g <sup>-1</sup>            | 314 mAh g <sup>-1</sup>  | 50           | 217 mAh g <sup>-1</sup>  | 3         |
| FeF <sub>2</sub> nanorod/C                          | 50 mA g <sup>-1</sup>   | 4.2-1.0 V     | 352 mAh g <sup>-1</sup>            | 263 mAh g <sup>-1</sup>  | 50           | 263 mAh g <sup>-1</sup>  | 4         |
|                                                     | 100 mA g <sup>-1</sup>  | 4.2-1.0 V     | 345 mAh g <sup>-1</sup>            | 221 mAh g <sup>-1</sup>  | 50           | 181 mAh g <sup>-1</sup>  |           |
| FeF <sub>2</sub>                                    | 140 mA g <sup>-1</sup>  | 4.0-1.0 V     | -                                  | ~360 mAh g <sup>-1</sup> | 50           | ~200 mAh g <sup>-1</sup> | 5         |
| FeF <sub>2</sub> -rGO                               | 200 mA g <sup>-1</sup>  | 4.5-1.5 V     | 520 mAh g <sup>-1</sup>            | 450 mAh g <sup>-1</sup>  | 50           | <100 mAh g <sup>-1</sup> | 6         |
| FeF <sub>2</sub> /C                                 | 60 mA g <sup>-1</sup>   | 4.3-1.2 V     | 503 mAh g <sup>-1</sup>            | -                        | 20           | 183 mAh g <sup>-1</sup>  | 7         |
| FeF <sub>2</sub> film                               | 12.5 mA g <sup>-1</sup> | 4.5-1.0 V     | 371 mAh g <sup>-1</sup>            | ~330 mAh g <sup>-1</sup> | 10           | 348 mAh g <sup>-1</sup>  | 8         |
| C-FeF <sub>2</sub>                                  | 20 mA g <sup>-1</sup>   | 4.3-1.3 V     | 448 mAh g <sup>-1</sup>            | 328 mAh g <sup>-1</sup>  | 50           | 220 mAh g <sup>-1</sup>  | 9         |
| C-FeF <sub>2</sub>                                  | 20 mA g <sup>-1</sup>   | 4.3-1.3 V     | 418 mAh g <sup>-1</sup>            | 363 mAh g <sup>-1</sup>  | 40           | 297 mAh g <sup>-1</sup>  | 10        |
| C-FeF <sub>2</sub>                                  | 20 mA g <sup>-1</sup>   | 4.3-1.3 V     | 442 mAh g <sup>-1</sup>            | ~420 mAh g <sup>-1</sup> | 50           | ~240 mAh g <sup>-1</sup> | 11        |
| FeF <sub>2</sub>                                    | 20 mA g <sup>-1</sup>   | 5.0-1.0 V     | 590 mAh g <sup>-1</sup>            | 420 mAh g <sup>-1</sup>  | 25           | 200 mAh g <sup>-1</sup>  | 12        |
| rGO-FeF <sub>2</sub> @C                             | 200 mA g <sup>-1</sup>  | 4.0-1.0 V     | 497 mAh g <sup>-1</sup>            | ~400 mAh g <sup>-1</sup> | 50           | ~400 mAh g <sup>-1</sup> | This work |
|                                                     | 200 mA g <sup>-1</sup>  |               | 432 mAh g <sup>-1</sup>            | 347 mAh g <sup>-1</sup>  |              | 348 mAh g <sup>-1</sup>  |           |

## References

- 1 S. Kim, J. Liu, K. Sun, J. Wang, S.J. Dillon, P.V. Braun, Improved performance

- in FeF<sub>2</sub> conversion cathodes through use of a conductive 3D scaffold and Al<sub>2</sub>O<sub>3</sub> ALD Coating, *Adv. Funct. Mater.*, 2017, 1702783.
- 2 M.A. Reddy, B. Breitung, V.S.K. Chakravadhanula, C. Wall, M. Engel, C. Kübel, A.K. Powell, H. Hahn, M. Fichtner, CFX derived carbon–FeF<sub>2</sub> nanocomposites for reversible lithium storage, *Adv. Energy Mater.*, 2003, **3**, 308-313.
  - 3 Y. Zhang, L. Wang, J. Li, L. Wen, X. He, A one-pot approach towards FeF<sub>2</sub>-carbon core-shell composite and its application in lithium ion batteries, *J. Alloys Compd.*, 2014, **606**, 226-230.
  - 4 J. Zhou, D. Zhang, X. Zhang, H. Song, X. Chen, Carbon-nanotube-encapsulated FeF<sub>2</sub> nanorods for high-performance lithium-ion cathode materials, *ACS Appl. Mater. Interfaces*, 2014, **6**, 21223-21229.
  - 5 Q. Huang, T.P. Pollard, X. Ren, D. Kim, A. Magasinski, O. Borodin, G. Yushin, Fading mechanisms and voltage hysteresis in FeF<sub>2</sub>-NiF<sub>2</sub> solid solution cathodes for lithium and lithium-ion batteries, *Small*, 2019, **15**, 1804670.
  - 6 D. Ni, W. Sun, C. Lu, Z. Wang, J. Qiao, H. Cai, C. Liu, K. Sun, Improved rate and cycling performance of FeF<sub>2</sub>-rGO hybrid cathode with poly (acrylic acid) binder for sodium ion batteries, *J. Power Sources*, 2019, **413**, 449-458.
  - 7 M. Tang, Z. Zhang, Z. Wang, J. Liu, H. Yan, J. Peng, L. Xu, S. Guo, S. Ju, G. Chen, Synthesis of FeF<sub>2</sub>/carbon composite nanoparticle by one-pot solid state reaction as cathode material for lithium-ion battery, *J. Mater. Res. Technol.*, 2018, **7**, 73-76.
  - 8 M.F. Parkinson, J. K. Ko, A. Halajko, S. Sanghvi, G.G. Amatucci, *Electrochim.*



- Acta*, 2014, **125**, 71-82.
- 9 M.A. Reddy, B. Breitung, C. Wall, S. Trivedi, V.S. Chakravadhanula, M. Helen, M. Fichtner, Effect of vertically structured porosity on electrochemical performance of FeF<sub>2</sub> films for lithium batteries, *Energy Technol.*, 2016, **4**, 201-211.
  - 10 M. Helena, M. Fichtner, M.A. Reddy, Electrochemical synthesis of carbon-metal fluoride nanocomposites as cathode materials for lithium batteries, *Electrochem. Commun.*, 2020, **120** 106846.
  - 11 M.A. Reddy, B. Breitung, V.S.K. Chakravadhanula, M. Helen, R. Witte, C. Rongeat, C. Kubel, H. Hahn, M. Fichtner, Facile synthesis of C-FeF<sub>2</sub> nanocomposites from CF<sub>x</sub>: influence of carbon precursor on reversible lithium storage, *RSC Adv.*, 2018, **8**, 36802-36811.
  - 12 M.J. Armstrong, A. Panneerselvam, C. O'Regan, M.A. Morris, J.D. Holmes, Supercritical-fluid synthesis of FeF<sub>2</sub> and CoF<sub>2</sub> Li-ion conversion materials, *J. Mater. Chem. A*, 2013, **1**, 10667-10676.
  - 13 A.W. Xiao, H.J. Lee, I. Capone, A. Robertson, T.U. Wi, J. Fawdon, S. Wheeler, H.W. Lee, N. Grobert, M. Pasta, Understanding the conversion mechanism and performance of monodisperse FeF<sub>2</sub> nanocrystal cathodes, *Nat. Mater.*, 2020, **19**, 644-654.
